# Supplementary material for: PIWI Associated siRNAs and piRNAs Specifically Require the Caenorhabditis elegans HEN1 Ortholog henn-1
Source: PLoS Genet. 2012 Apr 19;8(4):e1002616. doi: 10.1371/journal.pgen.1002616 (PMC3334881; doi:10.1371/journal.pgen.1002616)
Supplement: Table S2 — Transgenic strains used in the study. Names and descriptions of strains are shown. (XLSX) [file pgen.1002616.s008.xlsx]

## Sheet: Sheet1
Table S2. Transgenic strains used in the study.
Strain	Genotype
GR1719	unc-119(ed3) III; mgSi3[pCMP2(ubl-1p::GFP::ubl-1-3'UTR Cbr-unc-119(+))] IV
GR1720	unc-119(ed3) III; mgSi4[pCMP2(ubl-1p::GFP::siR-1-sensor-ubl-1-3'UTR Cbr-unc-119(+))] IV
GR1721	unc-119(ed3) III; mgSi5[pCMP2(ubl-1p::GFP::siR-1-sensor-1-3sub-ubl-1-3'UTR Cbr-unc-119(+))] IV
GR1722	unc-119(ed3) III; mgSi6[pCMP2(ubl-1p::GFP::siR-1-sensor-4-5sub-ubl-1-3'UTR Cbr-unc-119(+))] IV
GR1723	unc-119(ed3) III; mgSi7[pCMP2(ubl-1p::GFP::siR-1-sensor-4del-ubl-1-3'UTR Cbr-unc-119(+))] IV
GR1724	unc-119(ed3) III; mgSi8[pCMP2(ubl-1p::GFP::siR-1-sensor-9-11sub-ubl-1-3'UTR Cbr-unc-119(+))] IV
GR1725	unc-119(ed3) III; mgSi9[pCMP2(ubl-1p::GFP::siR-1-sensor-13sub-ubl-1-3'UTR Cbr-unc-119(+))] IV
GR1726	unc-119(ed3) III; mgSi10[pCMP2(ubl-1p::GFP::siR-1-sensor-13del-ubl-1-3'UTR Cbr-unc-119(+))] IV
GR1727	unc-119(ed3) III; mgSi11[pCMP2(ubl-1p::GFP::siR-1-sensor-13ins-ubl-1-3'UTR Cbr-unc-119(+))] IV
GR1728	unc-119(ed3) III; mgSi12[pCMP2(ubl-1p::GFP::siR-1-sensor-20-22sub-ubl-1-3'UTR Cbr-unc-119(+))] IV
GR1729	henn-1(pk2295) III; mgSi13[pCMP2(ubl-1p::GFP::ubl-1-3'UTR Cbr-unc-119(+))] IV
GR1730	henn-1(pk2295) III; mgSi14[pCMP2(ubl-1p::GFP::siR-1-sensor-ubl-1-3'UTR Cbr-unc-119(+))] IV
GR1731	mgSi15[pCMP2(ubl-1p::GFP::ubl-1-3'UTR Cbr-unc-119(+))] IV; nrde-3(tm1116) X
GR1732	mgSi16[pCMP2(ubl-1p::GFP::siR-1-sensor-ubl-1-3'UTR Cbr-unc-119(+))] IV; nrde-3(tm1116) X
GR1733	rde-2(pk1657) I; mgSi17[pCMP2(ubl-1p::GFP::ubl-1-3'UTR Cbr-unc-119(+))] IV
GR1734	rde-2(pk1657) I; mgSi18[pCMP2(ubl-1p::GFP::siR-1-sensor-ubl-1-3'UTR Cbr-unc-119(+))] IV
GR1735	rrf-1(pk1417) I; mgSi19[pCMP2(ubl-1p::GFP::ubl-1-3'UTR Cbr-unc-119(+))] IV
GR1736	rrf-1(pk1417) I; mgSi20[pCMP2(ubl-1p::GFP::siR-1-sensor-ubl-1-3'UTR Cbr-unc-119(+))] IV
GR1745	mg463[unc-119(ed3) III; K02E2.11&K02E2.7(cbr-unc-119(+))] V
GR1746	mgSi3[pCMP2(ubl-1p::GFP::ubl-1-3'UTR Cbr-unc-119(+))] IV; mg463[unc-119(ed3) III; K02E2.11&K02E2.7(cbr-unc-119(+))] V
GR1800	mgSi4[pCMP2(ubl-1p::GFP::siR-1-sensor-ubl-1-3'UTR Cbr-unc-119(+))] IV; mg463[unc-119(ed3) III; K02E2.11&K02E2.7(cbr-unc-119(+))] V
